# Supplementary material
Source: ML conference proceedings conference paper supplement (https://proceedings.neurips.cc/paper_files/paper/2017/hash/69dafe8b58066478aea48f3d0f384820-Abstract.html)
Supplement: Supplementary file [file 69dafe8b58066478aea48f3d0f384820-Supplemental.zip]

## A Fast low-rank approximation of $AA^T$

We give an algorithm which matches the lower bound of Theorem 3.

**Theorem 10.** *There is an algorithm, which given  $A \in \mathbb{R}^{n \times d}$  computes  $N \in \mathbb{R}^{n \times k}$  in  $O(\text{nnz}(A)k) + n \cdot \text{poly}(k/\epsilon)$  time such that probability 99/100:*

$$\|AA^T - NN^T\|_F^2 \leq (1 + \epsilon)\|AA^T - (AA^T)_k\|_F^2.$$

*Proof.* It is known (see Lemma 11 of [CW17]) that there exists a distribution over random matrices  $R, S \in \mathbb{R}^{n \times O(k/\epsilon)}$  which can be applied to  $A$  in  $O(\text{nnz}(A)) + n \cdot \text{poly}(k/\epsilon)$  time such that with probability 199/200, setting

$$Y^* = \arg \min_{Y \in O(k/\epsilon) \times O(k/\epsilon) \text{ with rank } k} \|AA^T RY S^T AA^T - AA^T\|_F^2$$

we have:

$$\|AA^T RY^* S^T AA^T - AA^T\|_F^2 \leq (1 + \epsilon)\|AA^T - (AA^T)_k\|_F^2.$$

We can solve for an approximately optimal  $\tilde{Y}$  by further sketching our problem on the left and right (similar to the technique used in Lemma 15 of [CW17]). Specifically, if we let  $T_L, T_R \in \mathbb{R}^{n \times \text{poly}(k/\epsilon)}$  be drawn from the Count Sketch distribution, we can solve:

$$\tilde{Y} = \arg \min_{Y \in O(k/\epsilon) \times O(k/\epsilon) \text{ with rank } k} \|T_L^T AA^T RY S^T AA^T T_R - T_L^T AA^T T_R\|_F^2$$

and are guaranteed that with probability 99/100,

$$\|AA^T R\tilde{Y} S^T AA^T - AA^T\|_F^2 \leq (1 + 2\epsilon)\|AA^T - (AA^T)_k\|_F^2. \quad (11)$$

Computing  $\tilde{Y}$  requires forming  $T_L^T A$ ,  $A^T R$ ,  $S^T A$ , and  $A^T T_R$  and then multiplying the appropriate matrices together. This takes  $O(\text{nnz}(A)) + n \cdot \text{poly}(k/\epsilon)$  time. Once  $T_L^T AA^T R$ ,  $S^T AA^T T_R$  and  $T_L^T AA^T T_R$  have been formed we can solve for  $\tilde{Y}$  in  $\text{poly}(k/\epsilon)$  time using the formula of [FT07].

Finally, since  $\tilde{Y}$  is rank- $k$  we can factor  $\tilde{Y} = VV^T$  for  $V \in \mathbb{R}^{O(k/\epsilon) \times k}$  using the SVD. We can then compute  $N_1 = AA^T RV \in \mathbb{R}^{n \times k}$  and  $N_2 = AA^T SV \in \mathbb{R}^{n \times k}$  which satisfy  $\|AA^T - N_1 N_2^T\|_F^2 \leq (1 + 2\epsilon)\|AA^T - (AA^T)_k\|_F^2$  with probability 99/100 by (11).

$N_1$  and  $N_2$  both require  $O(\text{nnz}(A)k) + n \cdot \text{poly}(k/\epsilon)$  time to compute. The theorem follows from adjusting constants on  $\epsilon$  and noting that we can symmetrize  $N_1 N_2^T$  to form  $NN^T$  if desired in  $n \cdot \text{poly}(k/\epsilon)$  time. □

## B Hardness of outputting a low-rank subspace

Theorem 3 shows a lower bound on outputting a relative-error low-rank approximation to  $MM^T$ . Here we show that this hardness extends to the possibly easier problem of just outputting a low-rank span that contains a relative-error low-rank approximation. This result extends analogously to the other kernel lower bounds discussed in Section 2.

**Theorem 11** (Hardness of low-rank span for  $MM^T$ ). *Assume there is an algorithm  $\mathcal{A}$  which given any  $M \in \mathbb{R}^{n \times d}$  returns orthonormal  $Z \in \mathbb{R}^{n \times k}$  such that  $\|MM^T - ZZ^T MM^T\|_F^2 \leq \Delta_1 \|MM^T - (MM^T)_k\|_F^2$  in  $T(M, k)$  time for some approximation factor  $\Delta_1$ .*

*For any  $A \in \mathbb{R}^{n \times d}$  and  $C \in \mathbb{R}^{d \times k}$  each with integer entries in  $[-\Delta_2, \Delta_2]$ , let  $B = [A^T, wC]^T$  where  $w = 3\sqrt{\Delta_1} \Delta_2^2 nd$ . It is possible to compute the product  $AC$  in time  $T(B, 2k) + \tilde{O}((n + d)k^{\omega-1})$ .*

*Proof.*  $ZZ^T MM^T$  is the projection of  $M$  onto the column span of  $Z$ . This projection can be performed approximately using standard leverage score sampling techniques (see e.g., [CW13]). Let  $S \in \mathbb{R}^{s \times n}$  be a sampling matrix sampling rows of  $Z$  by its row norms (its leverage scores since

it is orthonormal) where  $s = c(k \log k)$  or some sufficiently large constant  $c$ . Let  $R$  be the  $n \times k$  matrix which selects the last  $k$  columns of  $MM^T$ .

Letting  $X^* = \arg \min_{X \in k \times k} \|ZX^T - MM^T R\|_F^2$  and  $X = \arg \min_{X \in k \times k} \|SZX^T - SMM^T R\|_F^2$  we have by a well known leverage score approximate regression result with high probability in  $k$ :

$$\begin{aligned} \|ZX^T - MM^T R\|_F^2 &= O(1) \cdot \|Z(X^*)^T - MM^T R\|_F^2 \\ &= O(1) \cdot \|ZZ^T MM^T R - MM^T R\|_F^2 \\ &= O(\Delta_1) \|MM^T - (MM^T)_k\|_F^2. \end{aligned}$$

Further, computing  $X$  requires  $\tilde{O}(dk^{\omega-1})$  time to compute the  $O(k \log k) \times k$  submatrix  $SMM^T R$  as well as  $\tilde{O}(k^\omega) = \tilde{O}(nk^{\omega-1})$  to perform the regression. This gives the result via Theorem 3 since computing  $Z$  with rank- $2k$   $ZZ^T$  gives a low-rank approximation of  $MM^T$  with error  $O(\Delta_1) \|MM^T - (MM^T)_{2k}\|_F^2$  measured on the last  $k$  columns of  $M$ . Small error on these columns is all that is needed to recover  $AC$  accurately (see proof of Theorem 3).  $\square$

## C Additional lower bound proofs

We now prove our hardness result for kernels depending on the squared distance  $\|a_i - a_j\|_2^2$ .

**Theorem 5.** Consider any kernel function  $\psi : \mathbb{R}^d \times \mathbb{R}^d \rightarrow \mathbb{R}^+$  with  $\psi(a_i, a_j) = f(\|a_i - a_j\|_2^2)$  for some function  $f$  which can be expanded as  $f(x) = \sum_{q=0}^{\infty} c_q x^q$  with  $c_1 \neq 0$  and  $|c_q/c_1| \leq G^{q-1}$  and for all  $q \geq 2$  and some  $G \geq 1$ .

Assume there is an algorithm  $\mathcal{A}$  which given input  $M \in \mathbb{R}^{n \times d}$  with kernel matrix  $K = \{\psi(m_i, m_j)\}$ , returns  $N \in \mathbb{R}^{n \times k}$  satisfying  $\|K - NN^T\|_F^2 \leq \Delta_1 \|K - K_k\|$  in  $T(M, k)$  time.

For any  $A \in \mathbb{R}^{n \times d}$ ,  $C \in \mathbb{R}^{d \times k}$ , with integer entries in  $[-\Delta_2, \Delta_2]$ , let  $B = [w_1 A^T, w_2 C]^T$  where  $w_1 = \frac{w_2}{36\sqrt{\Delta_1} \Delta_2^2 n d}$  and  $w_2 = \frac{1}{(16Gd^2 \Delta_2^4)(36\sqrt{\Delta_1} \Delta_2^2 n d)}$ . It is possible to compute  $AC$  in time  $T(B, 2k+3) + O(nk^{\omega-1})$ .

*Proof.* Define the distance matrix  $D \in \mathbb{R}^{n+k \times n+k}$  with  $D_{i,j} = \|b_i - b_j\|^2$ . Using the fact that  $\|b_i - b_j\|^2 = \|b_i\|^2 + \|b_j\|^2 - 2b_i^T b_j$  we have  $D = E + E^T - 2BB^T$  where  $E$  is a rank-1 matrix with all rows equal to  $[\|b_1\|_2^2, \dots, \|b_{n+k}\|_2^2]$ . We can write the kernel matrix for  $B$  and  $k$  as:

$$K = c_0 \begin{bmatrix} 1 & 1 \\ 1 & 1 \end{bmatrix} + c_1(E + E^T) - 2c_1 \begin{bmatrix} w_1^2 AA^T & w_1 w_2 AC \\ w_1 w_2 C^T A^T & w_2^2 C^T C \end{bmatrix} + c_2 D^{(2)} + c_3 D^{(3)} + \dots \quad (12)$$

where  $D_{i,j}^{(q)} = \|b_i - b_j\|^{2q}$ . Let  $\bar{K}$  be  $K - c_0 \cdot 1 - c_1(E + E^T)$ , with its top  $n \times n$  block set to 0.  $\bar{K}$  has rank at most  $2k$  and if we set  $Q \in \mathbb{R}^{n \times 2k+3}$  to be a matrix with columns spanning the columns of  $\bar{K}$ , the all ones vector,  $E$  and  $E^T$ , then letting  $N$  be the result of running  $\mathcal{A}$  on  $B$  with rank  $2k+3$ :

$$\|K - NN^T\|_F^2 \leq \Delta_1 \|K - QQ^T K\|_F^2 \leq \Delta_1 \left\| \begin{bmatrix} -2c_1 w_1^2 AA^T + c_2 \hat{D}^{(2)} + \dots & 0 \\ 0 & 0 \end{bmatrix} \right\|_F^2 \quad (13)$$

where  $\hat{D}^{(q)}$  denotes the top left  $n \times n$  submatrix of  $D^{(q)}$ .

By our bounds on the entries of  $A$ , for  $i, j \leq n$ ,  $\|b_i - b_j\|^2 \leq 4d\Delta_2^2 w_1^2$  and by our setting of  $w_1, w_2$ , plugging into (13) we have for all  $i, j$ :

$$|(K - NN^T)_{i,j}| \leq \|K - NN^T\|_F \quad (14)$$

$$\begin{aligned} &\leq \sqrt{\Delta_1} n \left( 2c_1 d \Delta_2^2 w_1^2 + \sum_{q=2}^{\infty} c_q (4d \Delta_2^2 w_1^2)^q \right) \\ &\leq \sqrt{\Delta_1} n c_1 d \Delta_2^2 w_1^2 \left( 2 + \sum_{q=2}^{\infty} (4Gd \Delta_2^2 w_1^2)^{q-1} \right) \quad (\text{Since } |c_q/c_1| \leq G^{q-1}) \\ &\leq 3\sqrt{\Delta_1} n c_1 d \Delta_2^2 w_1^2 \leq \frac{w_1 w_2 c_1}{12} \end{aligned} \quad (15)$$

where the second to last bound follows from the fact that  $w_1 < w_2$  and  $w_2$  is set small enough so  $(4Gd\Delta_2^2) \cdot w_2^2 \ll 1/2$  so the series converges to a sum  $< 1$ . Additionally, for  $i \leq n$  and  $j \leq k$  (i.e., considering the entries of  $K$  corresponding to  $AC$ ) we have:

$$K_{i,n+j} = c_0 + c_1(E + E^T)_{i,n+j} - 2c_1w_1w_2(AC)_{i,j} + \sum_{q=2}^{\infty} c_q D_{i,n+j}^{(q)}.$$

This last sum can be bounded by:

$$\begin{aligned} \left| \sum_{q=2}^{\infty} c_q D_{i,n+j}^{(q)} \right| &\leq c_1 \sum_{q=2}^{\infty} G^{q-1} (4\Delta_2^2 d w_2^2)^q && \text{(By assumption } |c_q/c_1| \leq G^{q-1} \text{)} \\ &\leq c_1 w_1 w_2 \sum_{q=2}^{\infty} G^{q-1} w_2^{2(q-1)} \frac{w_2}{w_1} (4\Delta_2^2 d)^q \\ &\leq c_1 w_1 w_2 \sum_{q=2}^{\infty} G^{q-1} w_2^{2q-3} (4\Delta_2^2 d)^q && \text{(Using } \frac{w_2}{w_1} \leq \frac{1}{w_2} \text{.)} \\ &\leq \frac{1}{3} c_1 w_1 w_2. && \text{(Using } w_2 \leq \frac{1/4}{16G\Delta_2^4 d^2} \text{ so the series converges.)} \end{aligned}$$

If we set  $v = NN_{i,n+j}^T - c_0 - c_1(E + E^T)_{i,n+j}$  we thus have combining with (14) for  $i \leq n, j \leq k$

$$|v + 2c_1w_1w_2(AC)_{i,j}| \leq \frac{5c_1w_1w_2}{12}$$

and so we can compute  $(AC)_{i,j}$  exactly by rounding  $v$  to the nearest integer multiple of  $c_1w_1w_2$ . This gives the theorem since we can compute the required entries of  $NN^T$  and  $E$  in  $O(nk^{\omega-1})$  time.  $\square$
